# Supplementary figures and images for: Spatial Distribution of Hospitalizations for Ischemic Heart Diseases in the Central Region of Asturias, Spain
Source: MDPI journal article supplement (doi:10.3390/ijerph182312320), 2021-11-24

# Posterior risk probability

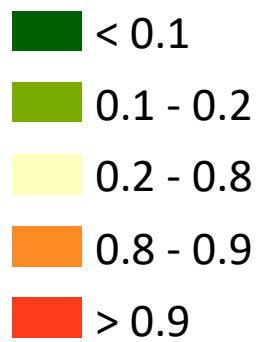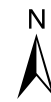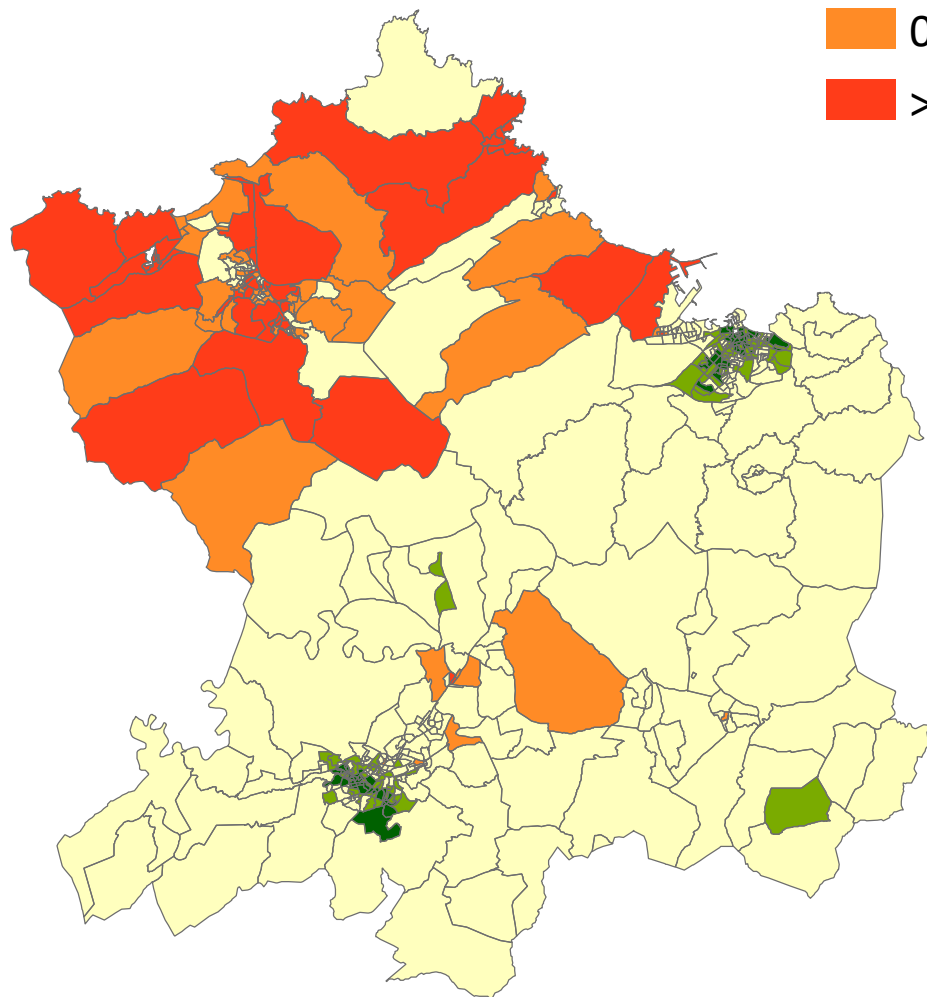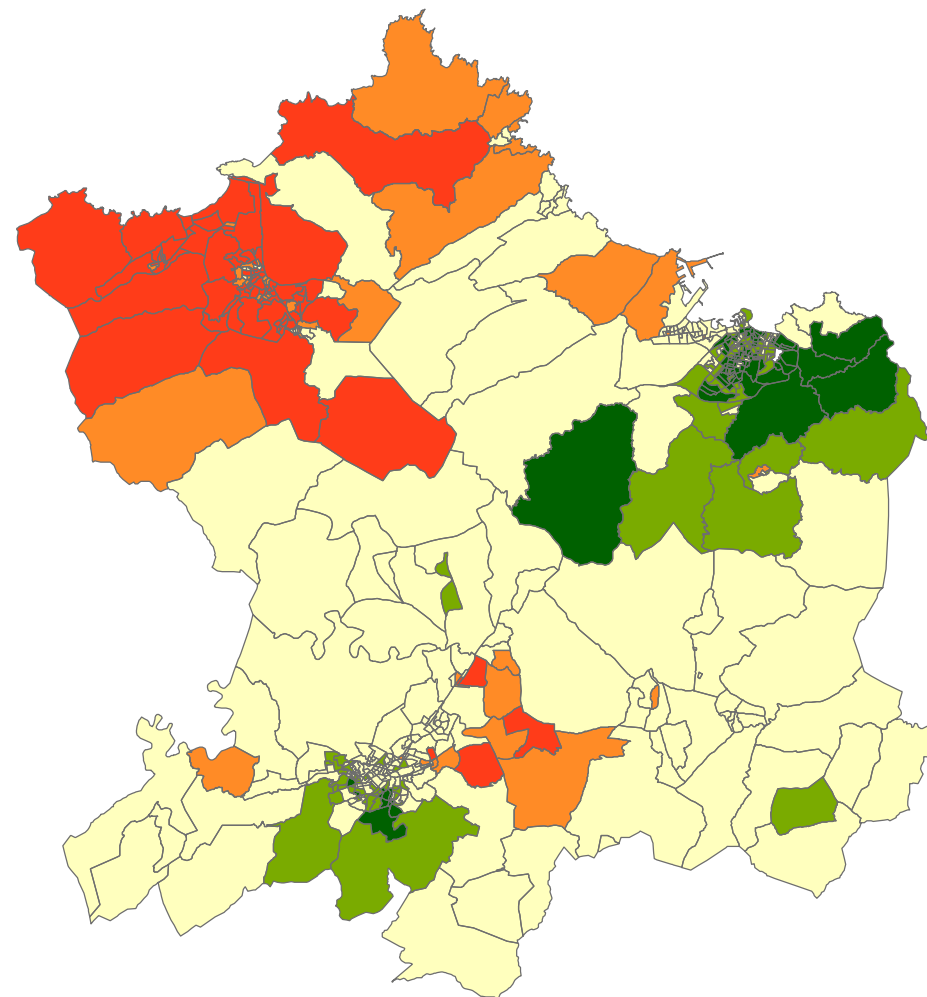

Women

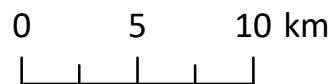

Men

Supplement: s1 [file s1]

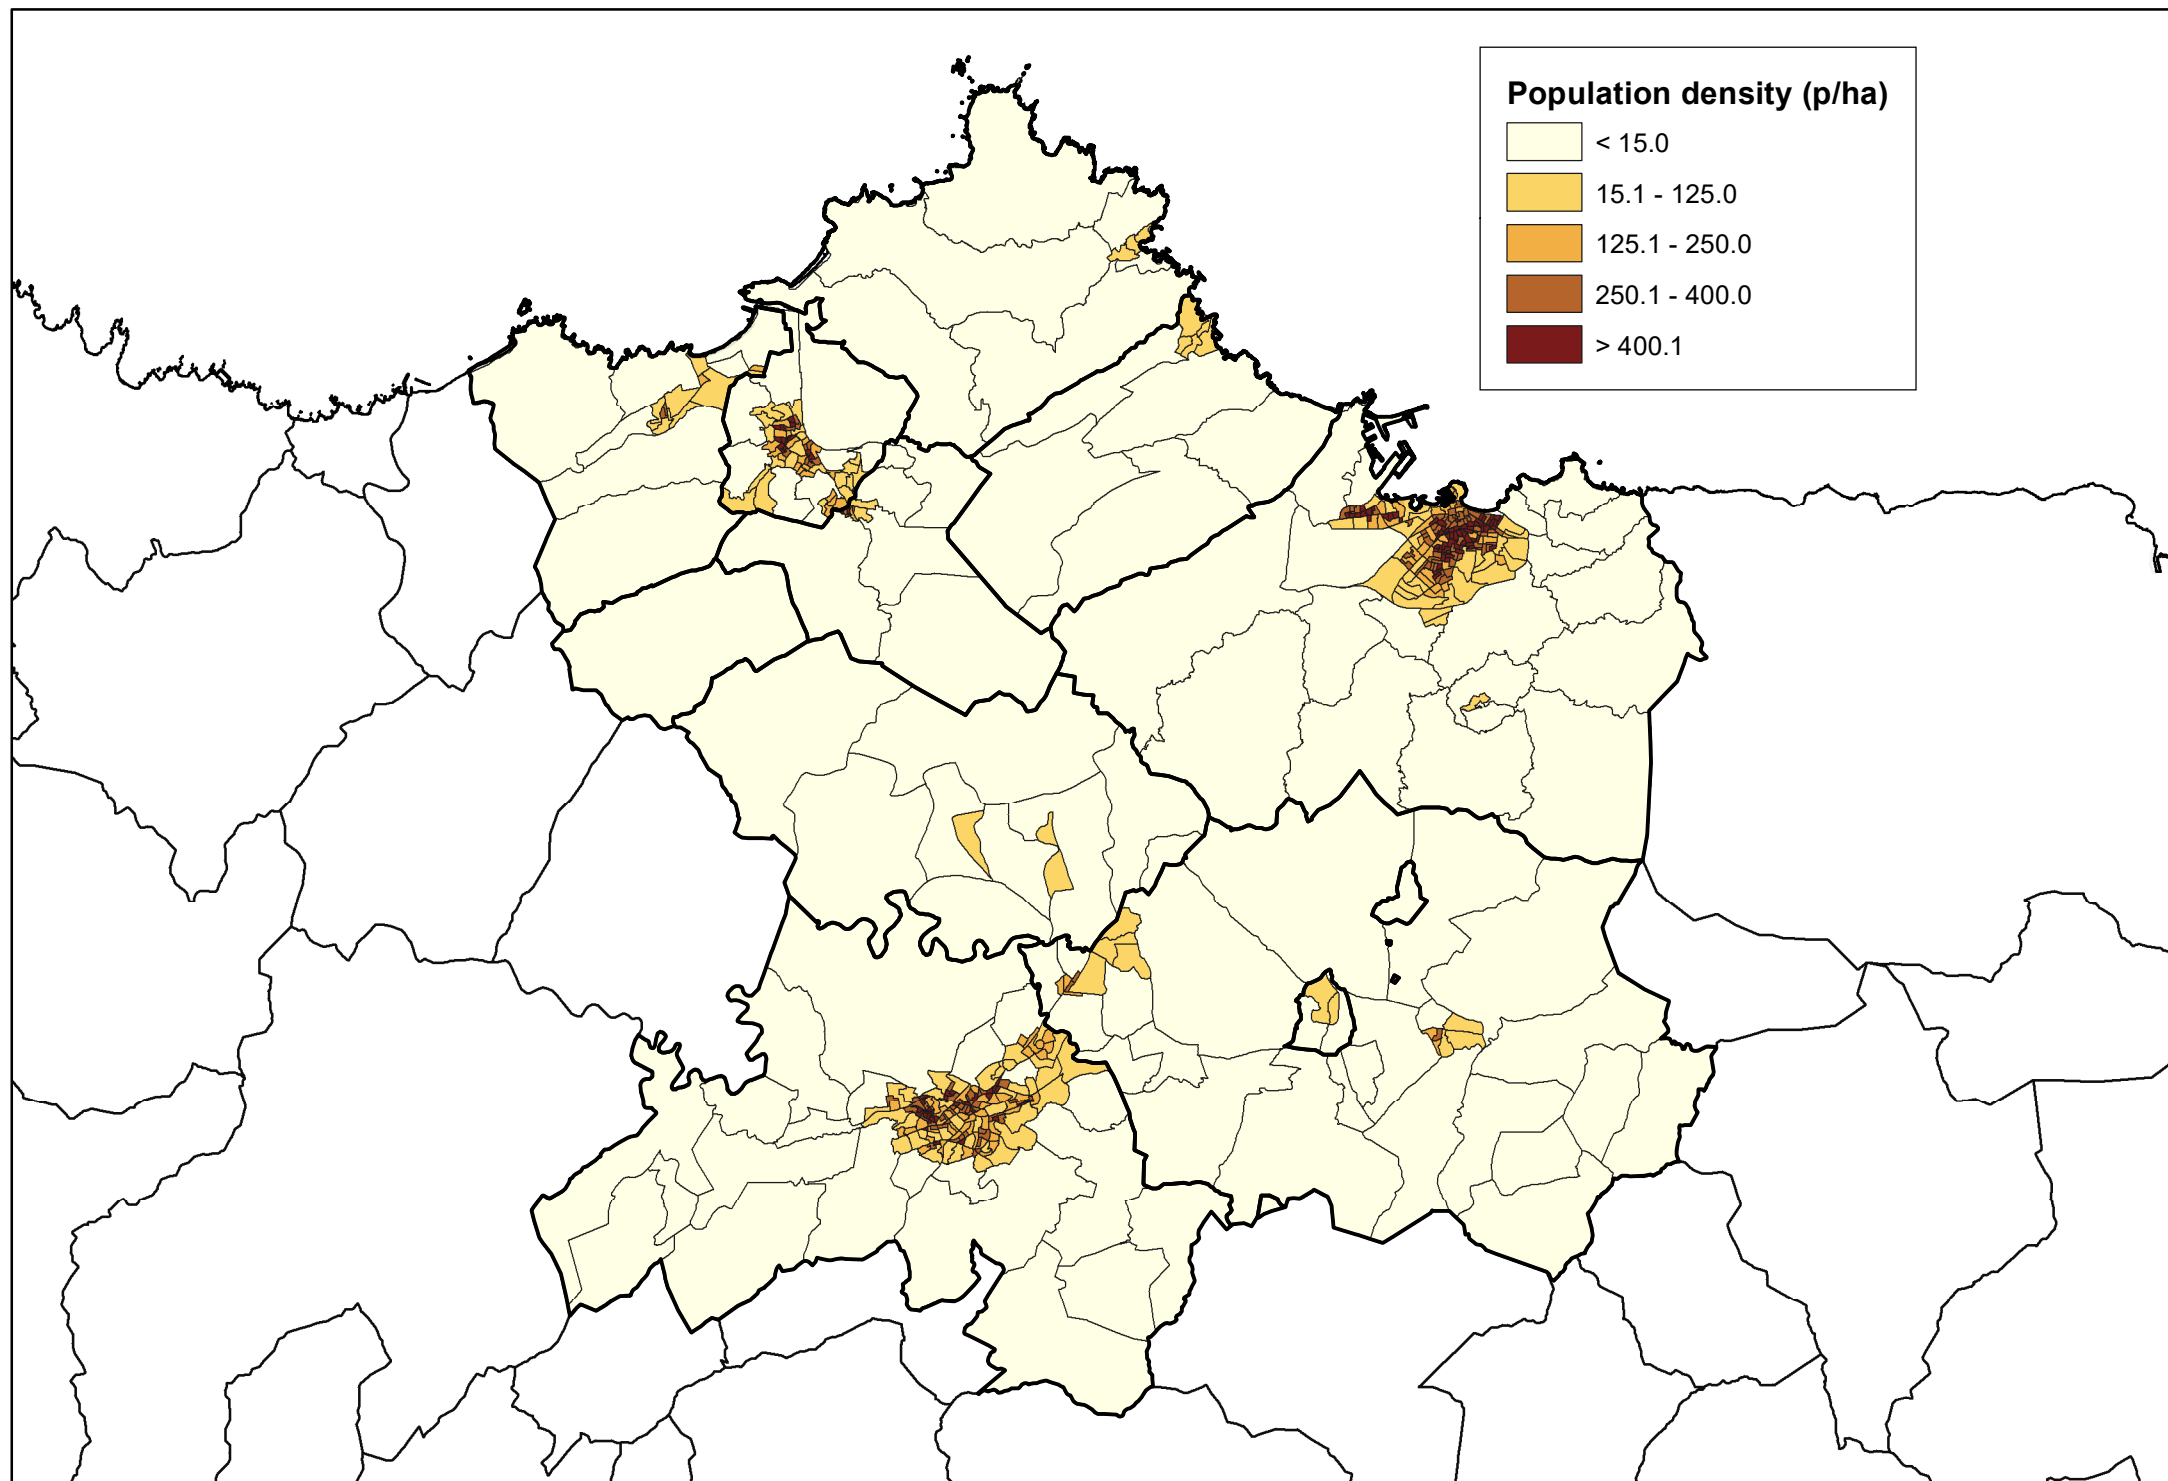

Supplement: s1 [file s1]

# Smoothed relative risk

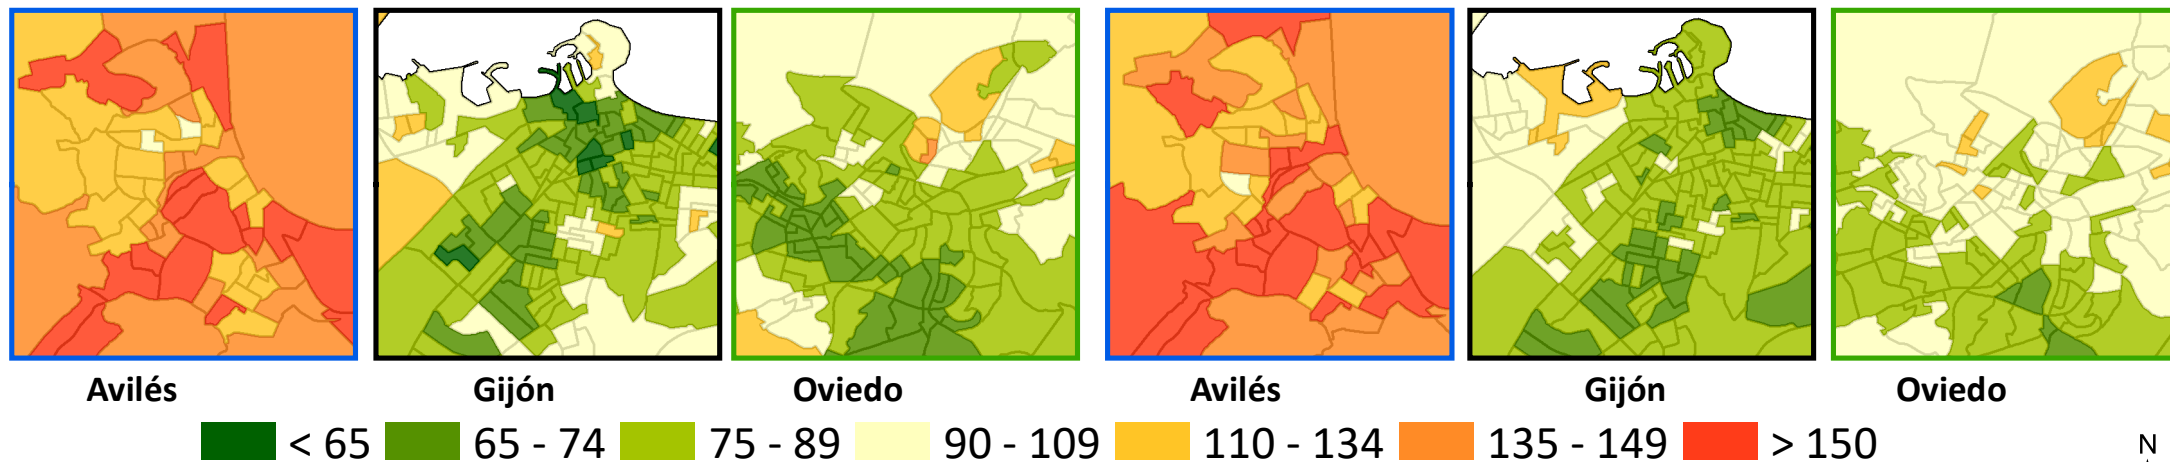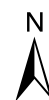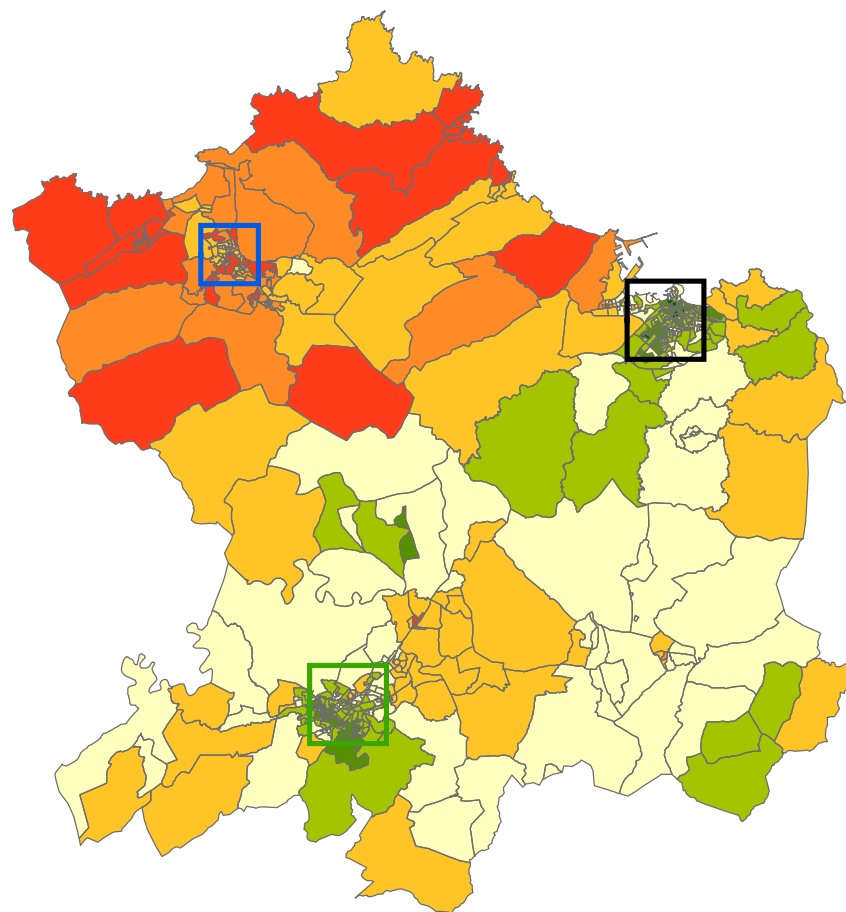

Women

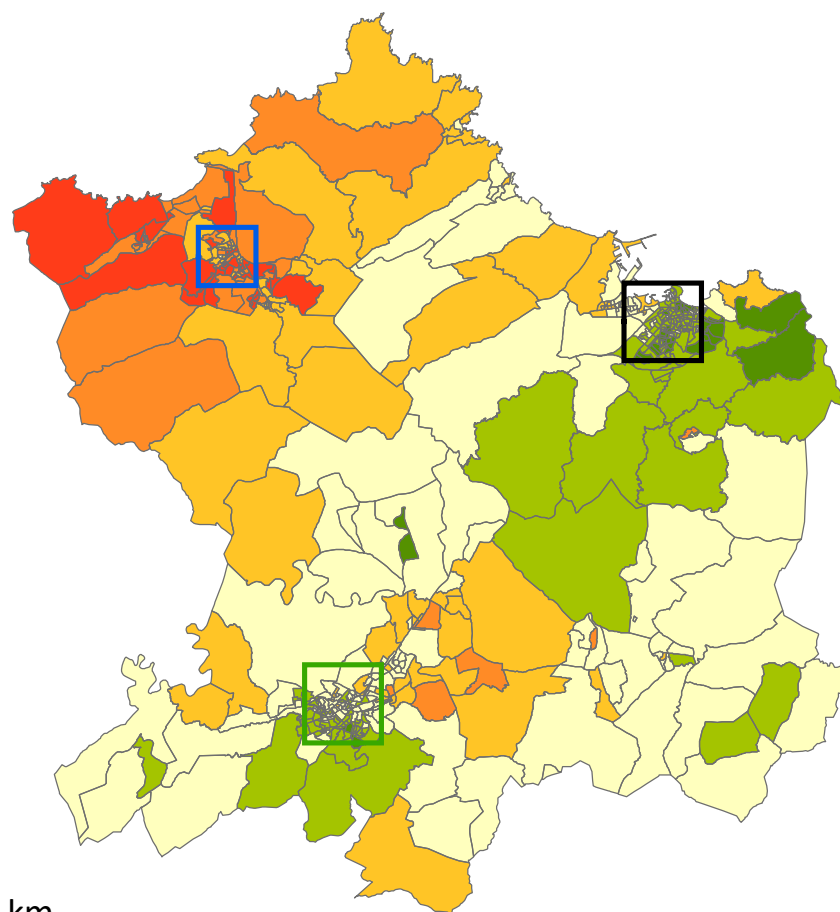

Men

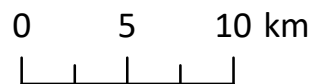

Supplement: s1 [file s1]
